# Supplementary material for: Quorum sensing in Aliivibrio wodanis 06/09/139 and its role in controlling various phenotypic traits
Source: PeerJ journal article supplement (doi:10.7717/peerj.11980), 2021-08-24
Supplement: PCR_sequencing.pdf [file PCR_sequencing.pdf]

**Alignment 1: *litR* and  $\Delta litR$  alignment**

**AWOD\_I\_0419 (*litR* Gene ID: 28539952 and flanking region sequence)**

**AM-01 (forward sequence)**

**AM-02 (complemented reverse sequence)**

|            |                                                                    |
|------------|--------------------------------------------------------------------|
|            | ..... ..... ..... ..... ..... ..... ..... .....                    |
|            | 5          15          25          35          45          55      |
| AWOD_I_041 | TACCACCTTA CCGATATAAG GTAGGTTACG ATATTTTTGT GCGTAGTCGA TACCAACACC  |
| AM-01      | -----                                                              |
| AM-02      | -----                                                              |
|            | ..... ..... ..... ..... ..... ..... ..... .....                    |
|            | 65          75          85          95          105        115     |
| AWOD_I_041 | AACAACAAAC TCATCCGGAA TAGAAAAACC AATCCAATCC ACTTTAACAT CAACTTCACG  |
| AM-01      | -----                                                              |
| AM-02      | -----                                                              |
|            | ..... ..... ..... ..... ..... ..... ..... .....                    |
|            | 125        135        145        155        165        175         |
| AWOD_I_041 | TCGAGAAGGT TTATCAAGCA GTGTACAAAT CGTAATTGAG TTTGGCTCAC GAATAGACAA  |
| AM-01      | -----                                                              |
| AM-02      | -----                                                              |
|            | ..... ..... ..... ..... ..... ..... ..... .....                    |
|            | 185        195        205        215        225        235         |
| AWOD_I_041 | GATCTCACAC ACTTTACTTA GTGTATTACC GGTATCTATA ATGTCTTCTA CTAATAGGAT  |
| AM-01      | -----                                                              |
| AM-02      | -----                                                              |
|            | ..... ..... ..... ..... ..... ..... ..... .....                    |
|            | 245        255        265        275        285        295         |
| AWOD_I_041 | GTCTTTACCT TTTATATCAT CATCAAGATC TTTCAAAATT CGTACGTCAC GCGTACTTTC  |
| AM-01      | -----                                                              |
| AM-02      | -----                                                              |
|            | ..... ..... ..... ..... ..... ..... ..... .....                    |
|            | 305        315        325        335        345        355         |
| AWOD_I_041 | CATGCTATTT CCATAGCTTG ATGCTGTTCAT AAAATCAACG GTCATTGGTG TATCAATCGC |
| AM-01      | -----                                                              |
| AM-02      | -----                                                              |
|            | ..... ..... ..... ..... ..... ..... ..... .....                    |
|            | 365        375        385        395        405        415         |
| AWOD_I_041 | TCGTGTCTAAA TCAGCCATAA ATACAAATGA GCCACG-TAA TAAACCAATC ATCACTAAGC |
| AM-01      | -----                                                              |
| AM-02      | -----TGA GCCACGGTAA TAAACCAATC ATCACTAAGC                          |
|            | ..... ..... ..... ..... ..... ..... ..... .....                    |
|            | 425        435        445        455        465        475         |
| AWOD_I_041 | TATCAGACTC TTTATAATGT TCAGAAATCT GTTGACCTAA TTCTTTAACA CGTTGAGTAA  |
| AM-01      | CAT-AGACTC TTTATA-TGT TCAGAAATCT GTTGACCTAA TTCTTTAACA CGTTGAGTAA  |
| AM-02      | TATCAGACTC TTTATAATGT TCAGAAATCT GTTGACCTAA TTCTTTAACA CGTTGAGTAA  |
|            | ..... ..... ..... ..... ..... ..... ..... .....                    |
|            | 485        495        505        515        525        535         |
| AWOD_I_041 | CCTCTTGTTT AGAGATCATC ACTTCTACTG TATGTTTCAT ACTGTCTCAC TTATTGTTG   |
| AM-01      | CCTCTTGTTT AGAGATCATC ACTTCTACTG TATGTTTCAT ACTGTCTCAC TTATTGTTG   |
| AM-02      | CCTCTTGTTT AGAGATCATC ACTTCTACTG TATGTTTCAT ACTGTCTCAC TTATTGTTG   |
|            | ..... ..... ..... ..... ..... ..... ..... .....                    |
|            | 545        555        565        575        585        595         |
| AWOD_I_041 | AGCCTACCTG CGGCAGGATT TAGATCTATA CAGTTTACAA CAAAAGCGCA CCTGAGATAG  |
| AM-01      | AGCCTACCTG CGGCAGGATT TAGATCTATA CAGTTTACAA CAAAAGCGCA CCTGAGATAG  |
| AM-02      | AGCCTACCTG CGGCAGGATT TAGATCTATA CAGTTTACAA CAAAAGCGCA CCTGAGATAG  |
|            | ..... ..... ..... ..... ..... ..... ..... .....                    |
|            | 605        615        625        635        645        655         |
| AWOD_I_041 | GGACAATTAT AAAAGTTTTT CATACTCTT TAGGATTAAG AGAAATTGTC TGATAAAATT   |
| AM-01      | GGACAATTAT AAAAGTTTTT CATACTCTT TAGGATTAAG AGAAATTGTC TGATAAAATT   |
| AM-02      | GGACAATTAT AAAAGTTTTT CATACTCTT TAGGATTAAG AGAAATTGTC TGATAAAATT   |



```

AM-02      ~~~~~ ~~~~~ ~~~~~ ~~~~~ ~~~~~ ~~~~~

      ....|....| ....|....| ....|....| ....|....| ....|....| ....|....|
      1445      1455      1465      1475      1485      1495
AWOD_I_041 ATGTATTTAT AAATAATATT CAGAAC~~~T CAGAAAGTAG ATAAT~~~A AAAAACCGCT
AM-01      ~~~~~ ~~~TAATATT CAGAAC---T CAGAAAGTAG ATAAT---A AAAAACCGCT
AM-02      ~~~~~ ~~~TAATATT CAGAAC---T CAGAAAGTAG ATAAT---A AAAAACCGCT

      ....|....| ....|....| ....|....| ....|....| ....|....| ....|....|
      1505      1515      1525      1535      1545      1555
AWOD_I_041 GA~~~CTAAT CAGCGGTTTT TTTATATTTA AATTCTAATG GTTTAAGAGA AATTATTTCT
AM-01      GA---CTAAT CAGCGGTTTT TTTATATTTA AATTCTAATG GTTTAAGAGA AATTATTTCT
AM-02      GA---CTAAT CAGCGGTTTT TTTATATTTA AATTCTAATG GTTTAAGAGA AATTATTTCT

      ....|....| ....|....| ....|....| ....|....| ....|....| ....|....|
      1565      1575      1585      1595      1605      1615
AWOD_I_041 TTCTCTTTAC TGCTTTTGCA TTTGGAAGGT CAGTAATAGA ACCTTCATAA ATTTTCAGCAG
AM-01      TTCTCTTTAC TGCTTTTGCA TTTGGAAGGT CAGTAATAGA ACCTTCATAA ATTTTCAGCAG
AM-02      TTCTCTTTAC TGCTTTTGCA TTTGGAAGGT CAGTAATAGA ACCTTCATAA ATTTTCAGCAG

      ....|....| ....|....| ....|....| ....|....| ....|....| ....|....|
      1625      1635      1645      1655      1665      1675
AWOD_I_041 CCATACCAAT TGATTCATGC AATGTTGGGT GAGCATGGAT AGTTAGTGCG AT~~ATCTTC
AM-01      CCATACCAAT TGATTCATGC AATGTTGGGT GAGCATGGAT AGTTAGTGCG AT--ATCTTC
AM-02      CCATACCAAT TGATTCATGC AATGTTGGGT GAGCATGGAT AGTTAGTGCG AT--ATCTTC

      ....|....| ....|....| ....|....| ....|....| ....|....| ....|....|
      1685      1695      1705      1715      1725      1735
AWOD_I_041 TGCATCACAA CCCATTTCGA TTGCAAGGCC AATTTCACCA AGAAGCTCAC CAGCATTAGT
AM-01      TGCATCACAA CCCATTTCGA TTGCAAGGCC AATTTCACCA AGAAGCTCAC CAGCATTAGT
AM-02      TGCATCACAA CCCATTTCGA T-GCAAGGCC AAT--CACCA AGAG---TAC CAGCTCC---

      ....|....| ....|....| ....|....| ....|....| ....|....| ....|....|
      1745      1755      1765      1775      1785      1795
AWOD_I_041 ACCAACAATA GCACCACCGA TAACACGGTT AGTGTCTTTA TCAAAAAGAA GCTTAGTTAG
AM-01      ACCAACAATA GCACCACCGA ATAACACGA- -----
AM-02      -----

      ....|....| ....|....| ....|....| ....|....| ....|....| ....|....|
      1805      1815      1825      1835      1845      1855
AWOD_I_041 ACCATCAGCA CAATCTGAAG CGATTGCACG GCCTGATGCA GCCCAAGGGA AGCTTGCTGC
AM-01      -----
AM-02      -----

      ....|....| ....|....| ....|....| ....|....| ....|....| ....|....|
      1865      1875      1885      1895      1905      1915
AWOD_I_041 TTCGTAATTA ATACCTTCAG CTTTGTCTTC TTTTCTGTT TTACCAACCC AAGCGACTTC
AM-01      -----
AM-02      -----

      ....|....| ....|....| ....|....| ....|....| ....|....| ....|....|
      1925      1935      1945      1955      1965      1975
AWOD_I_041 TGGCTCAGTA TAAGCAATTG AAGGAATTAC TTTAGGATCG AAGTAGTGCT TCTTACCAGA
AM-01      -----
AM-02      -----

      ....|....| ....|....| ....|....| ....|....| ....|....| ....|....|
      1985      1995      2005      2015      2025      2035
AWOD_I_041 AATAACTTCA GCAGCTACGT GACCTTCATG CACAC.....
AM-01      -----
AM-02      -----

      ....|....| ....|....| ....|....| ....|....| ....|....| ....|....|
      2045      2055      2065      2075      2085      2095
AWOD_I_041 -----
AM-01      -----
AM-02      -----

      ....|....| ....|....| ....|....| ....|....| ....|....| ....|....|
      2105      2115      2125      2135      2145      2155
AWOD_I_041 -----
AM-01      -----
AM-02      -----

      ....|....| ....|....| ....|....| ....|....| ....|....| ....|....|
      2165      2175      2185      2195      2205      2215
AWOD_I_041 -----

```

```

AM-01 -----
AM-02 -----

.....|.....| .....|.....| .....|.....| .....|.....| .....|.....|
      2225      2235      2245      2255      2265      2275
AWOD_I_041 .....
AM-01 -----
AM-02 -----

.....|.....| .....|.....| .....|.....| .....|.....| .....|.....|
      2285      2295      2305      2315      2325      2335
AWOD_I_041 .....
AM-01 -----
AM-02 -----

.....|.....| .....|.....| .....|.....| .....|.....| .....|.....|
      2345      2355      2365      2375      2385      2395
AWOD_I_041 .....
AM-01 -----
AM-02 -----

.....|.....| .....|.....| .....|.....| .....|.....| .....|.....|
      2405      2415      2425      2435      2445      2455
AWOD_I_041 .....
AM-01 -----
AM-02 -----

.....|.....| .....|.....| .....|.....| .....|.....| .....|.....|
      2465      2475      2485      2495      2505      2515
AWOD_I_041 .....
AM-01 -----
AM-02 -----

.....|.....| .....|.....| .....|.....| .....|.....| .....|.....|
      2525      2535      2545      2555      2565      2575
AWOD_I_041 .....
AM-01 -----
AM-02 -----

.....|.....| .....|.....| ..
      2585      2595
AWOD_I_041 .....
AM-01 -----
AM-02 -----

```

**Alignment 2: *litR* and *litR'* alignment**

**AWOD\_I\_0419 (*litR* and flanking region sequence)**

**AM-02 (*litR'* forward sequence)**

**AM-01 (*litR'* reverse complemented sequence replicate 1)**

**AM-3 (*litR'* reverse complemented sequence replicate 2)**

```

.....|.....| .....|.....| .....|.....| .....|.....| .....|.....|
      5      15      25      35      45      55
AWOD_I_041 TACCACCTTA CCGATATAAG GTAGGTTACG ATATTTTTGT GCGTAGTCGA TACCAACACC
AM-02 ~~~~~
AM-3 -----
AM-01 -----

.....|.....| .....|.....| .....|.....| .....|.....| .....|.....|
      65      75      85      95      105      115
AWOD_I_041 AACAAACAAAC TCATCCGGAA TAGAAAAACC AATCCAATCC ACTTAAACAT CAACTTCACG
AM-02 ~~~~~
AM-3 -----
AM-01 -----

.....|.....| .....|.....| .....|.....| .....|.....| .....|.....|
      125      135      145      155      165      175
AWOD_I_041 TCGAGAAGGT TTATCAAGCA GTGTACAAAT CGTAATTGAG TTTGGCTCAC GAATAGACAA
AM-02 ~~~~~
AM-3 -----

```

```

AM-01 -----

      ....|....| ....|....| ....|....| ....|....| ....|....|
      185      195      205      215      225      235
AWOD_I_041 GATCTCACAC ACTTTACTTA GTGTATTACC GGTATCTATA ATGTCTTCTA CTAATAGGAT
AM-02 ~~~~~
AM-3 -----
AM-01 -----

      ....|....| ....|....| ....|....| ....|....| ....|....|
      245      255      265      275      285      295
AWOD_I_041 GTCTTTACCT TTTATATCAT CATCAAGATC TTTCAAAATT CGTACGTCAC GCGTACTTTC
AM-02 ~~~~~
AM-3 -----
AM-01 -----

      ....|....| ....|....| ....|....| ....|....| ....|....|
      305      315      325      335      345      355
AWOD_I_041 CATGCTATTT CCATAGCTTG ATGCTGTCAT AAAATCAACG GTCATTGGTG TATCAATCGC
AM-02 ~~~~~
AM-3 -----
AM-01 -----

      ....|....| ....|....| ....|....| ....|....| ....|....|
      365      375      385      395      405      415
AWOD_I_041 TCGTGTAAA TCAGCCATAA ATACAAATGA GCCACGTAAT AAACCAATCA TCACTAAGCT
AM-02 ~~~~~
AM-3 -----
AM-01 -----C

      ....|....| ....|....| ....|....| ....|....| ....|....|
      425      435      445      455      465      475
AWOD_I_041 ATCAGACTCT TTATAATGTT CAGAAATCTG TTGACCTAAT TCTTTAACAC GTTGAGTAAC
AM-02 ~~~~~
AM-3 -----
AM-01 AT-AGACTCT TTATA-TGTT CAGAAATCTG TTGACCTAAT TCTTTAACAC GTTGAGTAAC

      ....|....| ....|....| ....|....| ....|....| ....|....|
      485      495      505      515      525      535
AWOD_I_041 CTCTTGTTCA GAGATCATCA CTTCTACTGT ATGTTTCATA CTGTCTCACT TATTCGTTGA
AM-02 ~~~~~
AM-3 -----
AM-01 CTCTTGTTCA GAGATCATCA CTTCTACTGT ATGTTTCATA CTGTCTCACT TATTCGTTGA

      ....|....| ....|....| ....|....| ....|....| ....|....|
      545      555      565      575      585      595
AWOD_I_041 GCCTACCTGC GGCAGGATTT AGATCTATAC AGTTTACAAC AAAAGCGCAC CTGAGATAGG
AM-02 ~~~~~
AM-3 -----
AM-01 GCCTACCTGC GGCAGGATTT AGATCTATAC AGTTTACAAC AAAAGCGCAC CTGAGATAGG

      ....|....| ....|....| ....|....| ....|....| ....|....|
      605      615      625      635      645      655
AWOD_I_041 GACAATTATA AAAGTTTTTC ATACCTCTTT AGGATTAAAA GAAATTGTCT GATAAAATTA
AM-02 TGAGATAGGA CCATATAAAA GTTTTCATAC TCTTAGATAA AAGAATGTCT GATAAAATTA
AM-3 -----
AM-01 GACAATTATA AAAGTTTTTC ATACCTCTTT AGGATTAAAA GAAATTGTCT GATAAAATTA

      ....|....| ....|....| ....|....| ....|....| ....|....|
      665      675      685      695      705      715
AWOD_I_041 GTTAAAATAA AATGGTTTAT ACGGTAACA ACTGTAATTT TTTAAAATAA CCTTTAACCA
AM-02 GTAAAATAAA ATGGTTATAC GGTAACAAC TGTAATTTT TAAAATAACC CTTTAAACCA
AM-3 -----
AM-01 GTTAAAATAA AATGGTTTAT ACGGTAACA ACTGTAATTT TTTAAAATAA CCTTTAACCA

      ....|....| ....|....| ....|....| ....|....| ....|....|
      725      735      745      755      765      775
AWOD_I_041 CGTCATATTT TTAATTGATA ACATGAATAG TTGTTGAATA TATAAACAGC CTTATGTAAG
AM-02 CGTCATATTT TTAATTGATA ACATGAATAG TTGTTGAATA TATAAACAGC CTTATGTAAG
AM-3 -----
AM-01 CGTCATATTT TTAATTGATA ACATGAATAG TTGTTGAATA TATAAACAGC CTTATGTAAG

      ....|....| ....|....| ....|....| ....|....| ....|....|
      785      795      805      815      825      835
AWOD_I_041 GTTACTGAGT AGAATAATAA TAAAACCTA TATAAAATAA TAATTTGTTG GCAAGGATAT
AM-02 GTTACTGAGT AGAATAATAA TAAAACCTA TATAAAATAA TAATTTGTTG GCAAGGATAT
AM-3 -----

```

|            |            |             |             |            |            |            |
|------------|------------|-------------|-------------|------------|------------|------------|
| AM-01      | GTTACTGAGT | AGAATAATAA  | TAAAACCCCTA | TATAAAATAA | TAATTTGTG  | GCAAGGATAT |
|            | .... ....  | .... ....   | .... ....   | .... ....  | .... ....  | .... ....  |
|            | 845        | 855         | 865         | 875        | 885        | 895        |
| AWOD_I_041 | AAATAAATAT | GGATACGATC  | CAAAAAAGAC  | CGAGAACAAG | GCTATCTCCA | GAAAAGCGTA |
| AM-02      | AAATAAATAT | GGATACGATC  | CAAAAAAGAC  | CGAGAACAAG | GCTATCTCCA | GAAAAGCGTA |
| AM-3       | -----      | -----       | -----       | -----      | -----      | ---GAGCGTA |
| AM-01      | AAATAAATAT | GGATACGATC  | CAAAAAAGAC  | CGAGAACAAG | GCTATCTCCA | GAAAAGCGTA |
|            | .... ....  | .... ....   | .... ....   | .... ....  | .... ....  | .... ....  |
|            | 905        | 915         | 925         | 935        | 945        | 955        |
| AWOD_I_041 | AAGAACAAC  | TCTTGATATT  | GCTATCGAGG  | TATTTTCACA | ACGTGGTATC | GGCCGTGGCG |
| AM-02      | AAGAACAAC  | TCTTGATATT  | GCTATCGAGG  | TATTTTCACA | ACGTGGTATC | GGCCGTGGCG |
| AM-3       | A~G~AC~ACT | TCTTGATATT  | GCTATCGAGG  | TATTTTCACA | ACGTGGTATC | GGCCGTGGCG |
| AM-01      | AAGAACAAC  | TCTTGATATT  | GCTATCGAGG  | TATTTTCACA | ACGTGGTATC | GGCCGTGGCG |
|            | .... ....  | .... ....   | .... ....   | .... ....  | .... ....  | .... ....  |
|            | 965        | 975         | 985         | 995        | 1005       | 1015       |
| AWOD_I_041 | GTCATGCTGA | TGTTGCTGAA  | ATAGCACAAG  | T--ATCAGTA | --GCAACTGT | GTTTAACTAT |
| AM-02      | GTCATGCTGA | TGTTGCTGAA  | ATAGCACAAG  | T--ATCAGTA | --GCAACTGT | GTTTAACTAT |
| AM-3       | GTCATGCTGA | TGTTGCTGAA  | ATAGCACAAG  | T--ATCAGTA | --GCAACTGT | GTTTAACTAT |
| AM-01      | GTCATGCTGA | TGTTGCTGAA  | ATAGCACAAG  | T--ATCAGTA | --GCAACTGT | GTTTAACTAT |
|            | .... ....  | .... ....   | .... ....   | .... ....  | .... ....  | .... ....  |
|            | 1025       | 1035        | 1045        | 1055       | 1065       | 1075       |
| AWOD_I_041 | TTCCCTACAA | GAGAAGATCT  | TGTTGATGAC  | GTATTAACC  | GAGTAGAAGA | TGAGTTCCAT |
| AM-02      | TTCCCTACAA | GAGAAGATCT  | TGTTGATGAC  | GTATTAACC  | GAGTAGAAGA | TGAGTTCCAT |
| AM-3       | TTCCCTACAA | GAGAAGATCT  | TGTTGATGAC  | GTATTAACC  | GAGTAGAAGA | TGAGTTCCAT |
| AM-01      | TTCCCTACAA | GAGAAGATCT  | TGTTGATGAC  | GTATTAACC  | GAGTAGAAGA | TGAGTTCCAT |
|            | .... ....  | .... ....   | .... ....   | .... ....  | .... ....  | .... ....  |
|            | 1085       | 1095        | 1105        | 1115       | 1125       | 1135       |
| AWOD_I_041 | TTATTTGTTA | AGAATTC AAT | CTCTCTAGAG  | C-TTGACGTT | CGTACAAATC | TTCACTCACT |
| AM-02      | TTATTTGTTA | AGAATTC AAT | CTCTCTAGAG  | C~TTGACGTT | CGTACAAATC | TTCACTCACT |
| AM-3       | TTATTTGTTA | AGAATTC AAT | CTCTCTAGAG  | C-TTGACGTT | CGTACAAATC | TTCACTCACT |
| AM-01      | TTATTTGTTA | AGAATTC AAT | CTCTCTAGAG  | C-TTGACGTT | CGTACAAATC | TTCACTCACT |
|            | .... ....  | .... ....   | .... ....   | .... ....  | .... ....  | .... ....  |
|            | 1145       | 1155        | 1165        | 1175       | 1185       | 1195       |
| AWOD_I_041 | TTTAATGAAT | ATTATTGATG  | CTGTTTCATTC | AGAAAATAAA | TGGATTAAAG | TGTGGTTTGA |
| AM-02      | TTTAATGAAT | ATTATTGATG  | CTGTTTCATTC | AGAAAATAAA | TGGATTAAAG | TGTGGTTTGA |
| AM-3       | TTTAATGAAT | ATTATTGATG  | CTGTTTCATTC | AGAAAATAAA | TGGATTAAAG | TGTGGTTTGA |
| AM-01      | TTTAATGAAT | ATTATTGATG  | CTGTTTCATTC | AGAAAATAAA | TGGATTAAAG | TGTGGTTTGA |
|            | .... ....  | .... ....   | .... ....   | .... ....  | .... ....  | .... ....  |
|            | 1205       | 1215        | 1225        | 1235       | 1245       | 1255       |
| AWOD_I_041 | ATGGAGTACA | TCAACGCGCG  | AAGAAGTTTG  | GCCTTTATTC | --TTAAGCAG | CCATGTGAAT |
| AM-02      | ATGGAGTACA | TCAACGCGCG  | AAGAAGTTTG  | GCCTTTATTC | ~TTAAGCAG  | CCATGTGAAT |
| AM-3       | ATGGAGTACA | TCAACGCGCG  | AAGAAGTTTG  | GCCTTTATTC | --TTAAGCAG | CCATGTGAAT |
| AM-01      | ATGGAGTACA | TCAACGCGCG  | AAGAAGTTTG  | GCCTTTATTC | --TTAAGCAG | CCATGTGAAT |
|            | .... ....  | .... ....   | .... ....   | .... ....  | .... ....  | .... ....  |
|            | 1265       | 1275        | 1285        | 1295       | 1305       | 1315       |
| AWOD_I_041 | AATCAAAGA  | TCATTTCGCAC | AATGTTTGCT  | GAAGGTATAG | AGCGAAATGA | AGTGTGCAAT |
| AM-02      | AATCAAAGA  | TCATTTCGCAC | AATGTTTGCT  | GAAGGTATAG | AGCGAAATGA | AGTGTGCAAT |
| AM-3       | AATCAAAGA  | TCATTTCGCAC | AATGTTTGCT  | GAAGGTATAG | AGCGAAATGA | AGTGTGCAAT |
| AM-01      | AATCAAAGA  | TCATTTCGCAC | AATGTTTGCT  | GAAGGTATAG | AGCGAAATGA | AGTGTGCAAT |
|            | .... ....  | .... ....   | .... ....   | .... ....  | .... ....  | .... ....  |
|            | 1325       | 1335        | 1345        | 1355       | 1365       | 1375       |
| AWOD_I_041 | GACCATACTT | CTGAAAATTT  | GGCAAAAATG  | CTACACGGGA | TTT---GTT  | ATTC-TGTAT |
| AM-02      | GACCATACTT | CTGAAAATTT  | GGCAAAAATG  | CTACACGGGA | TTT---GTT  | ATTC-TGTAT |
| AM-3       | GACCATACTT | CTGAAAATTT  | GGCAAAAATG  | CTACACGGGA | TTT---GTT  | ATTC-TGTAT |
| AM-01      | GACCATACTT | CTGAAAATTT  | GGCAAAAATG  | CTACACGGGA | TTT---GTT  | ATTC-TGTAT |
|            | .... ....  | .... ....   | .... ....   | .... ....  | .... ....  | .... ....  |
|            | 1385       | 1395        | 1405        | 1415       | 1425       | 1435       |
| AWOD_I_041 | TTATTCAAGC | GAATCGTAGC  | TCTTCATCTG  | AAGAACTTGA | AGAAA--CAG | CTAA-TTGCT |
| AM-02      | TTATTCAAGC | GAATCGTAGC  | TCTTCATCTG  | AAGAACTTGA | AGAAA~CAG  | CTAA-TTGCT |
| AM-3       | TTATTCAAGC | GAATCGTAGC  | TCTTCATCTG  | AAGAACTTGA | AGAAA--CAG | CTAA-TTGCT |
| AM-01      | TTATTCAAGC | GAATCGTAGC  | TCTTCATCTG  | AAGAACTTGA | AGAAA--CAG | CTAAATTGCT |
|            | .... ....  | .... ....   | .... ....   | .... ....  | .... ....  | .... ....  |
|            | 1445       | 1455        | 1465        | 1475       | 1485       | 1495       |
| AWOD_I_041 | TCTTAAATAT | GTTATGTATT  | TA-TAAATAA  | TATTCAGAAC | TCAGAAAGTA | GATAATAAAA |
| AM-02      | TCTTAAATAT | GTTATGTATT  | TA~TAAATAA  | TATTCAGAAC | TCAGAAAGTA | GATAATAAAA |
| AM-3       | TCTTAAATAT | GTTATGTATT  | TA-TAAATAA  | TATTCAGAAC | TCAGAAAGTA | GATAATAAAA |



```

AM-01      .....
           .....|.....| .....|.....| .....|.....| .....|.....|
           2165      2175      2185      2195      2205      2215
AWOD_I_041 .....
AM-02     -----
AM-3      .....
AM-01     .....
           .....|.....| .....|.....| .....|.....| .....|.....|
           2225      2235      2245      2255      2265      2275
AWOD_I_041 .....
AM-02     -----
AM-3      .....
AM-01     .....
           .....|.....| .....|.....| .....|.....| .....|.....|
           2285      2295      2305      2315      2325      2335
AWOD_I_041 .....
AM-02     -----
AM-3      .....
AM-01     .....
           .....|.....| .....|.....| .....|.....| .....|.....|
           2345      2355      2365      2375      2385      2395
AWOD_I_041 .....
AM-02     -----
AM-3      .....
AM-01     .....
           .....|.....| .....|.....| .....|.....| .....|.....|
           2405      2415      2425      2435      2445      2455
AWOD_I_041 .....
AM-02     -----
AM-3      .....
AM-01     .....
           .....|.....| .....|.....| .....|.....| .....|.....|
           2465      2475      2485      2495      2505      2515
AWOD_I_041 .....
AM-02     -----
AM-3      .....
AM-01     .....
           .....|.....| .....|.....| .....|.....| .....|.....|
           2525      2535      2545      2555      2565      2575
AWOD_I_041 .....
AM-02     -----
AM-3      .....
AM-01     .....
           .....|.....| .....|.....| .....|.....| .....|.....|
           2585      2595      2605      2615      2625
AWOD_I_041 .....
AM-02     -----
AM-3      .....
AM-01     .....

```

**Alignment 3: *ainS* and  $\Delta$ *ainS* alignment**

**AWOD\_I\_1040 (*ainS* Gene ID: 28540605 and flanking region sequence)**

**AM-01 ( $\Delta$ *ainS* forward sequence)**

**AM-2 ( $\Delta$ *ainS* reverse complement sequence)**

```

           .....|.....| .....|.....| .....|.....| .....|.....|
           5      15      25      35      45      55
AWOD_I_104 CATCTAGACG ACCAACAGAT ACCCAACGAG AATCTTTGAT TTTTGGTAAA CGATCAAAAA
AM-01      ~~~~~~

```



```

AM-2      ~~~~~ ~~~~~ ~~~~~ ~~~~~ ~~~~~ ~~~~~
          ....|....| ....|....| ....|....| ....|....| ....|....| ....|....|
           65      75      85      95      105     115
AWOD_I_104 CGGTACGACG ACCTTCAGGA TCGTGGCGAG TACATAACTC ACCTTCTGGT TTGTGGTAAG
AM-01      ~~~~~ ~~~~~ ~~~~~ ~~~~~ ~~~~~ ~~~~~
AM-2      ~~~~~ ~~~~~ ~~~~~ ~~~~~ ~~~~~ ~~~~~

          ....|....| ....|....| ....|....| ....|....| ....|....|
           125     135     145     155     165     175
AWOD_I_104 CAAGAACACG ACAGATTACT TCAGTAGACT CTTTACCCTA TACAACATGG CCATCGATAC
AM-01      ~~~~~ ~~~~~ ~~~~~ ~~~~~ ~~~~~ ~~~~~
AM-2      ~~~~~ ~~~~~ ~~~~~ ~~~~~ ~~~~~ ~~~~~

          ....|....| ....|....| ....|....| ....|....| ....|....|
           185     195     205     215     225     235
AWOD_I_104 GAATTTTCGC ATCAACATTT TCTAGCGCAT CACCTAGTTT TGCAATCTGG CCATCAACAC
AM-01      ~~~~~ ~~~~~ ~~~~~ ~~~~~ ~~~~~ ~~~~~
AM-2      ~~~~~ ~~~~~ ~~~~~ ~~~~~ ~~~~~ ~~~~~

          ....|....| ....|....| ....|....| ....|....| ....|....|
           245     255     265     275     285     295
AWOD_I_104 TAACACGATT AGACTGAATC ATCGTTTCTA ATTCACGACG AGAACCAAGA CCTGCTCGTG
AM-01      ~~~~~ ~~~~~ ~~~~~ ~~~~~ ~~~~~ ~~~~~
AM-2      ~~~~~ ~~~~~~TTTTT TTTTTTTTTY YYMMSSRRR RRRRGCGAGA CCTGCTCGTG

          ....|....| ....|....| ....|....| ....|....| ....|....|
           305     315     325     335     345     355
AWOD_I_104 CTAATACTTT CTGTAATTTT TCGCTCATTT TTTACCTTAT TATGTCGCCT TCACAGGCGT
AM-01      ~~~~GYACTT TCTGTATTTT TCGCTCATTT TTTACCTTAT TATGTCGCCT TCACAGGCGT
AM-2      CTAATACTTT CTGTAATTTT TCGCTCATTT TTTACCTTAT TATGTCGCCT TCACAGGCGT

          ....|....| ....|....| ....|....| ....|....| ....|....|
           365     375     385     395     405     415
AWOD_I_104 CAATTAGCTT TTATTAATCA AGGACCTATC TGAATAAGAT AAGATTCCTC AATCACTTTA
AM-01      CAATTAGCTT TTATTAATCA AGGACCTATC TGAATAAGAT AAGATTCCTC AATCACTTTA
AM-2      CAATTAGCTT TTATTAATCA AGGACCTATC TGAATAAGAT AAGATTCCTC AATCACTTTA

          ....|....| ....|....| ....|....| ....|....| ....|....|
           425     435     445     455     465     475
AWOD_I_104 AAATTTCTATA GAGGCTGATT ATACAATAAG GTTGTGACGA ATGGTAAAAA ATTAAGCACA
AM-01      AAATTTCTATA GAGGCTGATT ATACAATAAG GTTGTGACGA ATGGTAAAAA ATTAAGCACA
AM-2      AAATTTCTATA GAGGCTGATT ATACAATAAG GTTGTGACGA ATGGTAAAAA ATTAAGCACA

          ....|....| ....|....| ....|....| ....|....| ....|....|
           485     495     505     515     525     535
AWOD_I_104 AATTTATTTT ATGCTGACAT TTTTCAGTATG ATGATAGAGC AGCTTATAAA ACAAGCTGCT
AM-01      AATTTATTTT ATGCTGACAT TTTTCAGTATG ATGATAGAGC AGCTTATAAA ACAAGCTGCT
AM-2      AATTTATTTT ATGCTGACAT TTTTCAGTATG ATGATAGAGC AGCTTATAAA ACAAGCTGCT

          ....|....| ....|....| ....|....| ....|....| ....|....|
           545     555     565     575     585     595
AWOD_I_104 TATATCTATC AAATAAATAA CTGAACAACA ATTGCACAAT TGAATGCTC AAATATTTAT
AM-01      TATATCTATC AAATAAATAA CTGAACAACA ATTGCACAAT TGAATGCTC AAATATTTAT
AM-2      TATATCTATC AAATAAATAA CTGAACAACA ATTGCACAAT TGAATGCTC AAATATTTAT

          ....|....| ....|....| ....|....| ....|....| ....|....|
           605     615     625     635     645     655
AWOD_I_104 TTCAGGCTGA TATTACTTAA ACCAAAGGAG ATCCATATGA AATCGTTATA TAAAAAGTTA
AM-01      TTCAGGCTGA TATTACTTAA ACCAAAGGAG ATCCATATGA AATCGTTATA TAAAAAGTTA
AM-2      TTCAGGCTGA TATTACTTAA ACCAAAGGAG ATCCATATGA AATCGTTATA TAAAAAGTTA

          ....|....| ....|....| ....|....| ....|....| ....|....|
           665     675     685     695     705     715
AWOD_I_104 TCAACATTTG ATCTAAACAA TCTAGATGAA GGGGCACAAA AAAAATCAAC AAAATGAGTT
AM-01      TCAACATTTG ATCTAAACAA TCTAG~~~~~ ~~~~~ ~~~~~ ~~~~~
AM-2      TCAACATTTG ATCTAAACAA TCTAG~~~~~ ~~~~~ ~~~~~ ~~~~~

          ....|....| ....|....| ....|....| ....|....| ....|....|
           725     735     745     755     765     775
AWOD_I_104 TATAAAAAAG CTGTACGATT ACTGCATAAA ATCAAATACA CCGAACCTTT TACAACAATT
AM-01      ~~~~~ ~~~~~ ~~~~~ ~~~~~ ~~~~~ ~~~~~
AM-2      ~~~~~ ~~~~~ ~~~~~ ~~~~~ ~~~~~ ~~~~~

          ....|....| ....|....| ....|....| ....|....| ....|....|
           785     795     805     815     825     835
AWOD_I_104 AATTGAAGCT CGTAAACAGA CTATTTTATC TAAATTAAGT AACACAGATA CAGGTAACCT

```

```

AM-01 ~~~~~ ~~~~~ ~~~~~ ~~~~~ ~~~~~ ~~~~~
AM-2 ~~~~~ ~~~~~ ~~~~~ ~~~~~ ~~~~~ ~~~~~

      ....|....| ....|....| ....|....| ....|....| ....|....| ....|....|
      845      855      865      875      885      895
AWOD_I_104 TTGCATCTA TTTTCGACAG AAGAAGCCAT AGCTCTCATA GGAAGCAAC CCTGCAATAT
AM-01 ~~~~~ ~~~~~ ~~~~~ ~~~~~ ~~~~~ ~~~~~
AM-2 ~~~~~ ~~~~~ ~~~~~ ~~~~~ ~~~~~ ~~~~~

      ....|....| ....|....| ....|....| ....|....| ....|....| ....|....|
      905      915      925      935      945      955
AWOD_I_104 CTTACCTAAA CATTATTTTA TGATAGAGCA ACTTGCACAT AAATTATTG GATGTTTATT
AM-01 ~~~~~ ~~~~~ ~~~~~ ~~~~~ ~~~~~ ~~~~~
AM-2 ~~~~~ ~~~~~ ~~~~~ ~~~~~ ~~~~~ ~~~~~

      ....|....| ....|....| ....|....| ....|....| ....|....| ....|....|
      965      975      985      995      1005     1015
AWOD_I_104 AAGATGTTGG ACTGAGTTTG AAATTTTCCG AACCATTCAA CATTATCAA ATAACTACCA
AM-01 ~~~~~ ~~~~~ ~~~~~ ~~~~~ ~~~~~ ~~~~~
AM-2 ~~~~~ ~~~~~ ~~~~~ ~~~~~ ~~~~~ ~~~~~

      ....|....| ....|....| ....|....| ....|....| ....|....| ....|....|
      1025     1035     1045     1055     1065     1075
AWOD_I_104 CACATATTCT AAACAAGAGC ATATTAATTC GGAATCAAAC ATCATTGATG AAGATTATCA
AM-01 ~~~~~ ~~~~~ ~~~~~ ~~~~~ ~~~~~ ~~~~~
AM-2 ~~~~~ ~~~~~ ~~~~~ ~~~~~ ~~~~~ ~~~~~

      ....|....| ....|....| ....|....| ....|....| ....|....| ....|....|
      1085     1095     1105     1115     1125     1135
AWOD_I_104 CTATGAAATA GTTAATGATA TTTCAAAGGA TAAACGTCTA TTTTATACCG ATTTTTGCGC
AM-01 ~~~~~ ~~~~~ ~~~~~ ~~~~~ ~~~~~ ~~~~~
AM-2 ~~~~~ ~~~~~ ~~~~~ ~~~~~ ~~~~~ ~~~~~

      ....|....| ....|....| ....|....| ....|....| ....|....| ....|....|
      1145     1155     1165     1175     1185     1195
AWOD_I_104 ACAACCACTG CTAATATCCG ACGCCATTGT CTTAATAAAT ATAACAACAT TTATTAAGA
AM-01 ~~~~~ ~~~~~ ~~~~~ ~~~~~ ~~~~~ ~~~~~
AM-2 ~~~~~ ~~~~~ ~~~~~ ~~~~~ ~~~~~ ~~~~~

      ....|....| ....|....| ....|....| ....|....| ....|....| ....|....|
      1205     1215     1225     1235     1245     1255
AWOD_I_104 ACATAAATGG TATGAAATGC TTAGTATTCT TGACATCTCA TCAAAGGAG AGCATTTTAT
AM-01 ~~~~~ ~~~~~ ~~~~~ ~~~~~ ~~~~~ ~~~~~
AM-2 ~~~~~ ~~~~~ ~~~~~ ~~~~~ ~~~~~ ~~~~~

      ....|....| ....|....| ....|....| ....|....| ....|....| ....|....|
      1265     1275     1285     1295     1305     1315
AWOD_I_104 TCTGTACCAA TTAAAGACAA ACAATAGTTA CCCTACCATT ATTTCTTCAG CGCTTATTGA
AM-01 ~~~~~ ~~~~~ ~~~~~ ~~~~~ ~~~~~ ~~~~~
AM-2 ~~~~~ ~~~~~ ~~~~~ ~~~~~ ~~~~~ ~~~~~

      ....|....| ....|....| ....|....| ....|....| ....|....| ....|....|
      1325     1335     1345     1355     1365     1375
AWOD_I_104 ACCATATCAA GACAAAGCAA -ACTGGCTGT TCTTAAATGA TTTCTTCCAA ACCAAACATT
AM-01 ~~~~~ ~~~~~ ~~~~~ ~~~~~ ~~~~~ ~~~~~
AM-2 ~~~~~ ~~~~~ ~~~~~ ~~~~~ ~~~~~ ~~~~~

      ....|....| ....|....| ....|....| ....|....| ....|....| ....|....|
      1385     1395     1405     1415     1425     1435
AWOD_I_104 GGAAAAATGA AGGAGTAACA GATTCTTTAC TATCTTT--- TTTCCCTAAA CTGAAAACAA
AM-01 ~~~~~ ~~~~~ ~~~~~ ~~~~~ ~~~~~ ~~~~~
AM-2 ~~~~~ ~~~~~ ~~~~~ ~~~~~ ~~~~~ ~~~~~

      ....|....| ....|....| ....|....| ....|....| ....|....| ....|....|
      1445     1455     1465     1475     1485     1495
AWOD_I_104 CATACTCTAA TGACCTCTCA -TCAGATAAT TCTAATTTAT CCAGTTCAGA TCTAGAAAAT
AM-01 ~~~~~ ~~~~~ ~~~~~ ~~~~~ ~~~~~ ~~~~~
AM-2 ~~~~~ ~~~~~ ~~~~~ ~~~~~ ~~~~~ ~~~~~

      ....|....| ....|....| ....|....| ....|....| ....|....| ....|....|
      1505     1515     1525     1535     1545     1555
AWOD_I_104 GCTATTTTCT CTTCTATCAT AGACAAAAGA AGTGTGTGTG GAGTGATCCG ATTTACCATC
AM-01 ~~~~~ ~~~~~ ~~~~~ ~~~~~ ~~~~~ ~~~~~
AM-2 ~~~~~ ~~~~~ ~~~~~ ~~~~~ ~~~~~ ~~~~~

      ....|....| ....|....| ....|....| ....|....| ....|....| ....|....|
      1565     1575     1585     1595     1605     1615

```

```

AWOD_I_104  AATGGACCAC GCCCTAAATT AAACCAAT-A TATGTATTTA GCTCAAAAAG GATTAGCCAA
AM-01        ~~~~~
AM-2        ~~~~~

      ....|.....| ....|.....| ....|.....| ....|.....| ....|.....| ....|.....|
      1625      1635      1645      1655      1665      1675
AWOD_I_104  TGCACCTCTAC AACTCAGGAA GAGATATGAT CTTTCTTAT ATAGAACAAC CCGCAATGGT
AM-01        ~~~~~
AM-2        ~~~~~

      ....|.....| ....|.....| ....|.....| ....|.....| ....|.....| ....|.....|
      1685      1695      1705      1715      1725      1735
AWOD_I_104  TTTGTTTTTAC CAAGCAATAA ATAATGATAA CTGCTATAACA CCCTTCTTT TTA--CGAGC
AM-01        ~~~~~
AM-2        ~~~~~

      ....|.....| ....|.....| ....|.....| ....|.....| ....|.....| ....|.....|
      1745      1755      1765      1775      1785      1795
AWOD_I_104  CACCAAGATA TCAACAACCTC AGGATTAATC ACATATAAAG GGATCTGCTT AACTAAGCAT
AM-01        ~~~~~
AM-2        ~~~~~

      ....|.....| ....|.....| ....|.....| ....|.....| ....|.....| ....|.....|
      1805      1815      1825      1835      1845      1855
AWOD_I_104  ACAAGTAATG TGTTC AATCA ATATGATTTG AAATCTTATA ATGCTAAAAT TATAAAAAGA
AM-01        ~~~~~
AM-2        ~~~~~

      ....|.....| ....|.....| ....|.....| ....|.....| ....|.....| ....|.....|
      1865      1875      1885      1895      1905      1915
AWOD_I_104  AGAAAAGATT TAAAACAACG ATGAGTTTCT TATAAATGTT AATTGGCTTC CCTAAAGATA
AM-01        ~~~~~
AM-2        ~~~~~

      ....|.....| ....|.....| ....|.....| ....|.....| ....|.....| ....|.....|
      1925      1935      1945      1955      1965      1975
AWOD_I_104  ATCTATTGCT ATTTATTGCG GTATTCATTT TACTATGGGT AGCCTTCTTT ATCCGATCTT
AM-01        ~~~~~
AM-2        ~~~~~

      ....|.....| ....|.....| ....|.....| ....|.....| ....|.....| ....|.....|
      1985      1995      2005      2015      2025      2035
AWOD_I_104  TATTTAAAGA TCGGATGGAG GTTGATCCTA AAATCTACTA CCCCTACATA GGGTATTCTA
AM-01        ~~~~~
AM-2        ~~~~~

      ....|.....| ....|.....| ....|.....| ....|.....| ....|.....| ....|.....|
      2045      2055      2065      2075      2085      2095
AWOD_I_104  TTTTTATAGT CATTTGGATT TTAACCAACT TCTATTTTCA ATCTGAATTA TTATTAATCT
AM-01        ~~~~~
AM-2        ~~~~~

      ....|.....| ....|.....| ....|.....| ....|.....| ....|.....| ....|.....|
      2105      2115      2125      2135      2145      2155
AWOD_I_104  TCAGTGAAAA AATTGCTCTT TATATGGCAA TAGCGGCCAA CCTCGCTTCA TATTTGCTT
AM-01        ~~~~~
AM-2        ~~~~~

      ....|.....| ....|.....| ....|.....| ....|.....| ....|.....| ....|.....|
      2165      2175      2185      2195      2205      2215
AWOD_I_104  TTGCTTTTGC CTTTCTTTTT TCTTGTGCGC TCGTATCTAC TAGAAAAGAG AAAAAAATGG
AM-01        ~~~~~
AM-2        ~~~~~

      ....|.....| ....|.....| ....|.....| ....|.....| ....|.....| ....|.....|
      2225      2235      2245      2255      2265      2275
AWOD_I_104  CATCTTGGCA GGTAGTTTTA TTTTACGCAG AAACCGCCTT TGCTCTCGCT ATCAACCTAA
AM-01        ~~~~~
AM-2        ~~~~~

      ....|.....| ....|.....| ....|.....| ....|.....| ....|.....| ....|.....|
      2285      2295      2305      2315      2325      2335
AWOD_I_104  TACCTAATTT AGCGGTTACT AATGTAAC TAATTGATAA AGGTGTTTTT ACCATTAATT
AM-01        ~~~~~
AM-2        ~~~~~

```

|            |             |             |             |             |             |             |
|------------|-------------|-------------|-------------|-------------|-------------|-------------|
|            | 2345        | 2355        | 2365        | 2375        | 2385        | 2395        |
| AWOD_I_104 | TTGGACCATT  | TGCTTCTATT  | TTCTTTATCA  | ATGCCTTTGT  | CTTTATTGGT  | TTAATCATCC  |
| AM-01      | .....       | .....       | .....       | .....       | .....       | .....       |
| AM-2       | .....       | .....       | .....       | .....       | .....       | .....       |
|            | ..... ..... | ..... ..... | ..... ..... | ..... ..... | ..... ..... | ..... ..... |
|            | 2405        | 2415        | 2425        | 2435        | 2445        | 2455        |
| AWOD_I_104 | ATAATTTTTT  | ACAATTAAGA  | ACAAGTAAGC  | TAAAACCTAA  | CAAAGAAAAG  | TCCATTTACT  |
| AM-01      | .....       | .....       | .....       | .....       | .....       | .....       |
| AM-2       | .....       | .....       | .....       | .....       | .....       | .....       |
|            | ..... ..... | ..... ..... | ..... ..... | ..... ..... | ..... ..... | ..... ..... |
|            | 2465        | 2475        | 2485        | 2495        | 2505        | 2515        |
| AWOD_I_104 | TATTATTTGG  | CATTCTTATT  | TTTATGTCTT  | CAACCATCAT  | ATCTCAAGTT  | ATTATTCCTA  |
| AM-01      | .....       | .....       | .....       | .....       | .....       | .....       |
| AM-2       | .....       | .....       | .....       | .....       | .....       | .....       |
|            | ..... ..... | ..... ..... | ..... ..... | ..... ..... | ..... ..... | ..... ..... |
|            | 2525        | 2535        | 2545        | 2555        | 2565        | 2575        |
| AWOD_I_104 | TCGTATGGGG  | GGATTTCTCT  | TTTGCATGGC  | TTCCGCCCGC  | ACTTCTGTGA  | ACTGAATCCG  |
| AM-01      | .....       | .....       | .....       | .....       | .....       | .....       |
| AM-2       | .....       | .....       | .....       | .....       | .....       | .....       |
|            | ..... ..... | ..... ..... | ..... ..... | ..... ..... | ..... ..... | ..... ..... |
|            | 2585        | 2595        | 2605        | 2615        | 2625        | 2635        |
| AWOD_I_104 | TCCTTATTGG  | TTATACCCTA  | CTCTTTCATA  | GATTATATAG  | CCTACGTTAT  | ATTCATACT   |
| AM-01      | .....       | .....       | .....       | .....       | .....       | .....       |
| AM-2       | .....       | .....       | .....       | .....       | .....       | .....       |
|            | ..... ..... | ..... ..... | ..... ..... | ..... ..... | ..... ..... | ..... ..... |
|            | 2645        | 2655        | 2665        | 2675        | 2685        | 2695        |
| AWOD_I_104 | GGGCATGCTC  | ATACACGATT  | AATATAACTA  | TATATCTAAT  | ACCTATTACT  | CTTATTTATT  |
| AM-01      | .....       | .....       | .....       | .....       | .....       | .....       |
| AM-2       | .....       | .....       | .....       | .....       | .....       | .....       |
|            | ..... ..... | ..... ..... | ..... ..... | ..... ..... | ..... ..... | ..... ..... |
|            | 2705        | 2715        | 2725        | 2735        | 2745        | 2755        |
| AWOD_I_104 | TAACAAATGA  | CAATATCAAC  | TTACTATATA  | CTTGCATTTT  | TCTTATTATA  | TATACTGGGT  |
| AM-01      | .....       | .....       | .....       | .....       | .....       | .....       |
| AM-2       | .....       | .....       | .....       | .....       | .....       | .....       |
|            | ..... ..... | ..... ..... | ..... ..... | ..... ..... | ..... ..... | ..... ..... |
|            | 2765        | 2775        | 2785        | 2795        | 2805        | 2815        |
| AWOD_I_104 | TGTTTTGGGA  | AAAAACACTT  | AAAAAATCAA  | AACTAGTTTC  | TAGTCTATTA  | ATTTACAAAA  |
| AM-01      | .....       | .....       | .....       | .....       | .....       | .....       |
| AM-2       | .....       | .....       | .....       | .....       | .....       | .....       |
|            | ..... ..... | ..... ..... | ..... ..... | ..... ..... | ..... ..... | ..... ..... |
|            | 2825        | 2835        | 2845        | 2855        | 2865        | 2875        |
| AWOD_I_104 | ATAAGAAAAC  | ACCTGTAGAA  | GAAATATATG  | ATATTGCCGA  | TGAATTCAAA  | TACTCTAGTC  |
| AM-01      | .....       | .....       | .....       | .....       | .....       | .....       |
| AM-2       | .....       | .....       | .....       | .....       | .....       | .....       |
|            | ..... ..... | ..... ..... | ..... ..... | ..... ..... | ..... ..... | ..... ..... |
|            | 2885        | 2895        | 2905        | 2915        | 2925        | 2935        |
| AWOD_I_104 | AGCATGCTAT  | GATCAAGTTA  | GCTACACTTC  | TAGATACTCC  | ACAAGAAGAA  | TTATTACTTG  |
| AM-01      | .....       | .....       | .....       | .....       | .....       | .....       |
| AM-2       | .....       | .....       | .....       | .....       | .....       | .....       |
|            | ..... ..... | ..... ..... | ..... ..... | ..... ..... | ..... ..... | ..... ..... |
|            | 2945        | 2955        | 2965        | 2975        | 2985        | 2995        |
| AWOD_I_104 | TTGGAAAAAA  | TACTAATTAT  | AATATTTTTA  | TTCCACATCT  | TAATCAATCT  | AATTCGGCAC  |
| AM-01      | .....       | .....       | .....       | .....       | .....       | .....       |
| AM-2       | .....       | .....       | .....       | .....       | .....       | .....       |
|            | ..... ..... | ..... ..... | ..... ..... | ..... ..... | ..... ..... | ..... ..... |
|            | 3005        |             |             |             |             |             |
| AWOD_I_104 | TAGTTAAAG   |             |             |             |             |             |
| AM-01      | .....       |             |             |             |             |             |
| AM-2       | .....       |             |             |             |             |             |
